# Supplementary material for: The carbonization of polyacrylonitrile-derived electrospun carbon nanofibers studied by in situ transmission electron microscopy
Source: Royal Society of Chemistry journal article supplement (doi:10.1039/c8ra10491c), 2019-01-01
Supplement: c8ra10491c1.pdf [file c8ra10491c1.pdf]

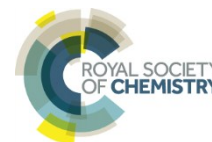

Journal Name

ARTICLE

## The carbonization of Polyacrylonitrile-derived electrospun carbon nanofibers studied by *in situ* Transmission Electron Microscopy

Received 00th January 20xx,  
Accepted 00th January 20xx

DOI: 10.1039/x0xx00000x

[www.rsc.org/](http://www.rsc.org/)

### Supplementary Information

Roland Schierholz<sup>a</sup> \*, Daniel Kröger<sup>a</sup>, Henning Weinrich<sup>a,b</sup>, Hermann Tempel<sup>a</sup>, Hans Kungl<sup>a</sup>, Joachim Mayer<sup>c,d</sup> and Rüdiger-A. Eichel<sup>a,b</sup>

<sup>a</sup> Institute of Energy and Climate Research, Fundamental Electrochemistry (IEK-9), Forschungszentrum Jülich GmbH, 52425 Jülich, Germany

<sup>b</sup> Institute of Physical Chemistry, RWTH Aachen University, 52074 Aachen, Germany

<sup>c</sup> Ernst Ruska-Centre for Microscopy and Spectroscopy with Electrons, Forschungszentrum Jülich GmbH, 52425 Jülich, Germany

<sup>d</sup> Central Facility for Electron Microscopy, RWTH Aachen University, 52074 Aachen, Germany

† Footnotes relating to the title and/or authors should appear here.

Electronic Supplementary Information (ESI) available: [details of any supplementary information available should be included here]. See DOI: 10.1039/x0xx00000x

**Table S1:** Spacing of lattice planes  $d_{hkl}$  in real space, length of corresponding diffraction vector  $g_{hkl}$  in reciprocal space and the relative intensity for graphite powder calculated from ICSD-file 76767 up to  $hkl = 006$ . Also given is the azimuthal position of the diffraction vector assuming a single crystal of graphite with (002) planes parallel to the fiber axis and the electron beam. The last two columns represent, if the corresponding intensity is expected to increase  $\uparrow$ , stay constant - or decrease  $\downarrow$  if extracted from an azimuthal range  $\pm 20^\circ$  perpendicular  $\perp$  or parallel  $\parallel$  to the fiber axis.

| h           | k | l | $d_{hkl}$<br>[pm] | $ g_{hkl} $<br>[1/nm] | $I_{rel}$<br>[%] | m             | azimut [°] |    |     | $I_{\perp}$  | $I_{\parallel}$ |
|-------------|---|---|-------------------|-----------------------|------------------|---------------|------------|----|-----|--------------|-----------------|
| Zone [0-10] |   |   |                   |                       |                  |               |            |    |     |              |                 |
| 0           | 0 | 2 | 336               | 2.985                 | 100              | 2             | 90         |    | 270 | $\uparrow$   | $\downarrow$    |
| 1           | 0 | 0 | 213               | 4.695                 | 3.5              | 6             | 0          |    | 180 | $\downarrow$ | $\uparrow$      |
| 1           | 0 | 1 | 203               | 4.926                 | 19.4             | $\frac{1}{2}$ | 342        | 18 | 162 | $\downarrow$ | $\uparrow$      |
| 1           | 0 | 2 | 180               | 5.587                 | 3.4              | $\frac{1}{2}$ | 328        | 32 | 148 | $\downarrow$ | $\uparrow$      |
| 0           | 0 | 4 | 168               | 5.952                 | 7.7              | 2             | 90         |    | 270 | $\uparrow$   | $\downarrow$    |
| 1           | 0 | 3 | 154               | 6.494                 | 6.5              | $\frac{1}{2}$ | 316        | 44 | 136 | -            | -               |
| 1           | 0 | 4 | 132               | 7.576                 | 0.9              | $\frac{1}{2}$ | 308        | 52 | 128 | -            | -               |
| 1           | 0 | 5 | 113.6             | 8.807                 | 2.0              | $\frac{1}{2}$ | 302        | 58 | 122 | -            | -               |
| 0           | 0 | 6 | 111.9             | 8.942                 | 1.6              | 2             | 90         |    | 270 | $\uparrow$   | $\downarrow$    |
| Zone [1-10] |   |   |                   |                       |                  |               |            |    |     |              |                 |
| 0           | 0 | 2 | 336               | 2.985                 | 100              | 2             | 90         |    | 270 | $\uparrow$   | $\downarrow$    |
| 0           | 0 | 4 | 168               | 5.952                 | 7.7              | 2             | 90         |    | 270 | $\uparrow$   | $\downarrow$    |
| 1           | 1 | 0 | 123               | 8.130                 | 6.7              | 6             | 0          |    | 180 | $\downarrow$ | $\uparrow$      |
| 1           | 1 | 2 | 115.7             | 8.659                 | 10.6             | $\frac{1}{2}$ | 328        | 32 | 148 | $\downarrow$ | $\uparrow$      |
| 0           | 0 | 6 | 111.9             | 8.942                 | 1.6              | 2             | 90         |    | 270 | $\uparrow$   | $\downarrow$    |

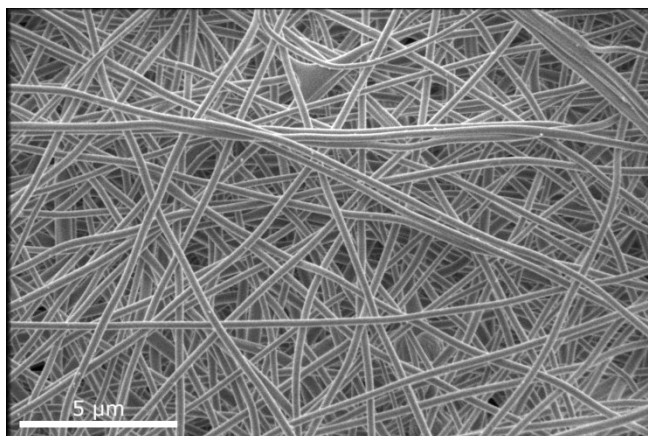

**Figure S1:** SEM image of a fiber mat oxidatively stabilized at 250 °C, which was the starting material for the *in situ* experiment.

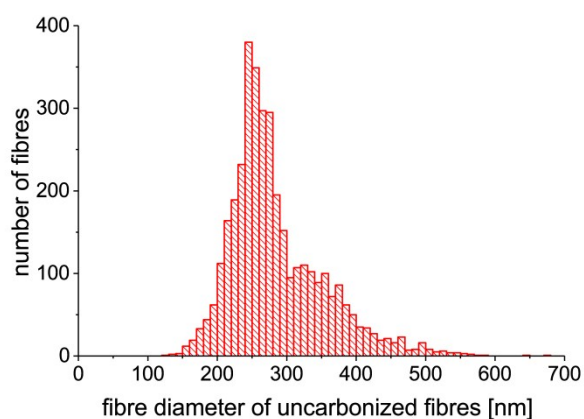

**Figure S2:** Distribution of fiber diameters of oxidatively stabilized fiber mats measured from SEM micrographs.

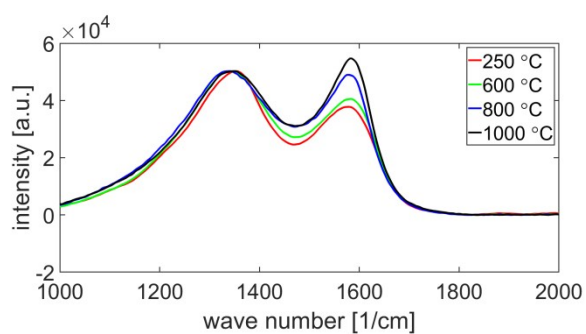

**Figure S3:** Raman spectra measured *ex situ* on fiber mats after oxidative stabilization at 250 °C and carbonized in a tube furnace under Argon flow for 10 h at 600 °C, 800 °C and 1000 °C.

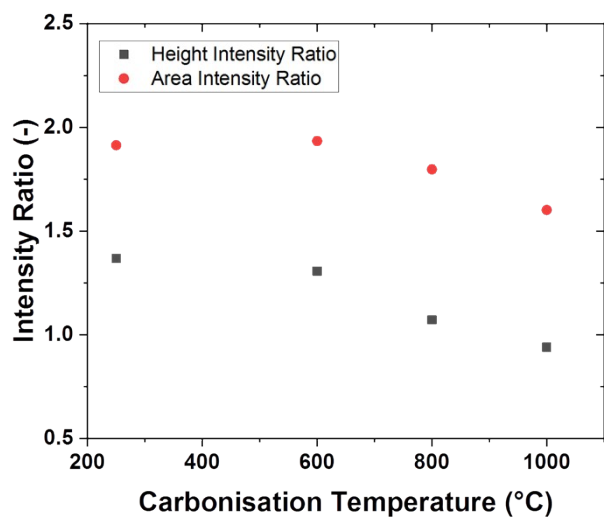

**Figure S4:** Intensity ratios of the D-band ( $\approx 1350\text{ cm}^{-1}$ ) over the G-band ( $\approx 1550\text{ cm}^{-1}$ ) calculated using the peak area (red circles) and just the maximum intensity (black squares).
